# Supplementary material for: Integrative genomic analysis for the functional roles of ITPKC in bone mineral density
Source: Oxford University Press journal article supplement (doi:10.1042/bsr20181481), 2018-10-24
Supplement: bsr20181481_supp1.pdf [file bsr20181481_supp1.pdf]

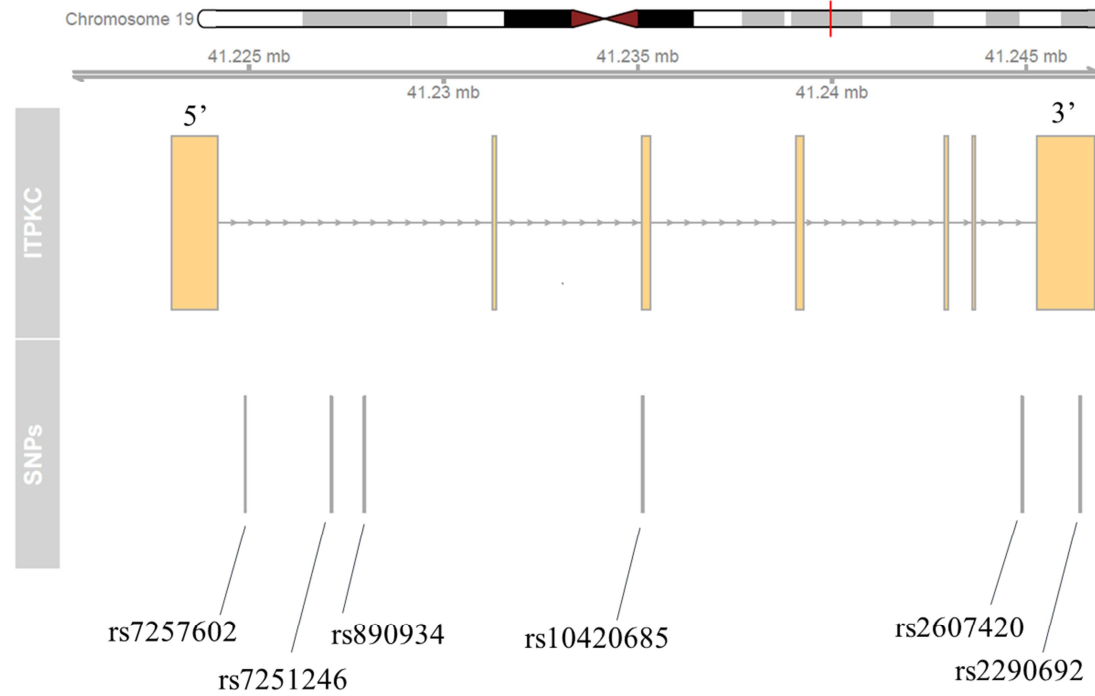

**Supplementary Figure 1.** Positions of the tag single nucleotide polymorphisms in the human *ITPKC* gene. Black and white boxes are coding and non-coding regions, respectively.

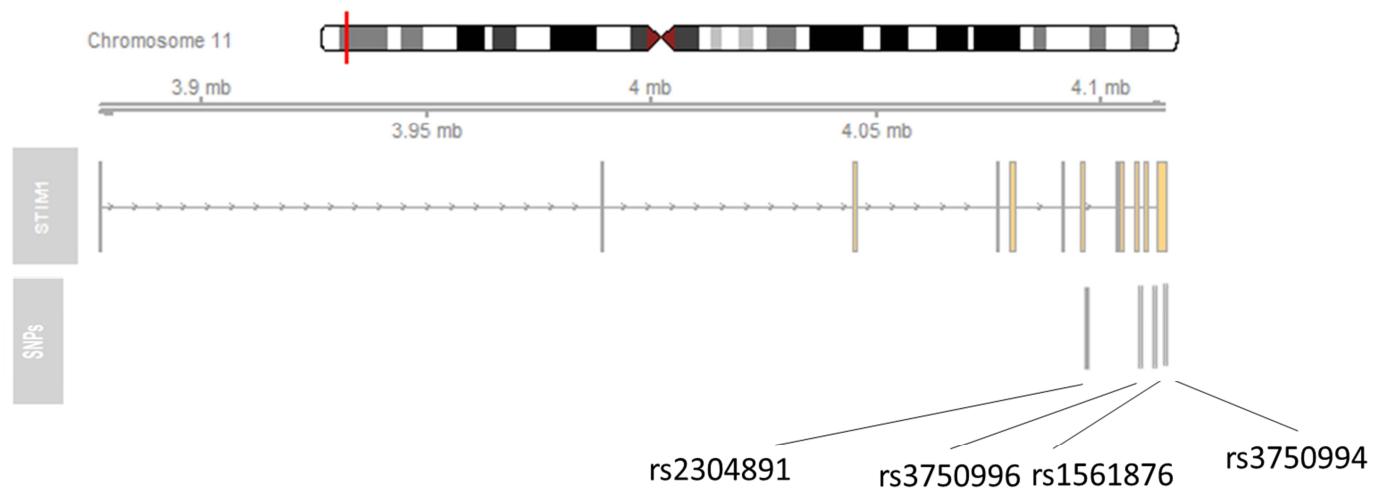

**Supplementary Figure 2.** Positions of the tag single nucleotide polymorphisms in the human *STIM1* gene. Black and white boxes are coding and non-coding regions, respectively.

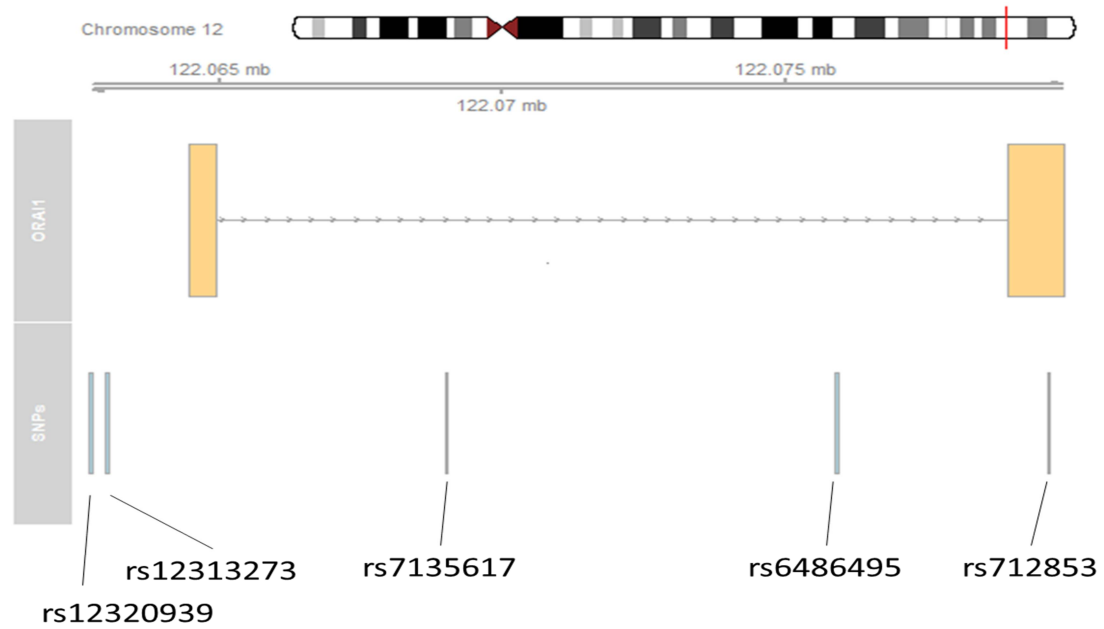

**Supplementary Figure 3.** Positions of the tag single nucleotide polymorphisms in the human *Or1A1* gene. Black and white boxes are coding and non-coding regions, respectively.

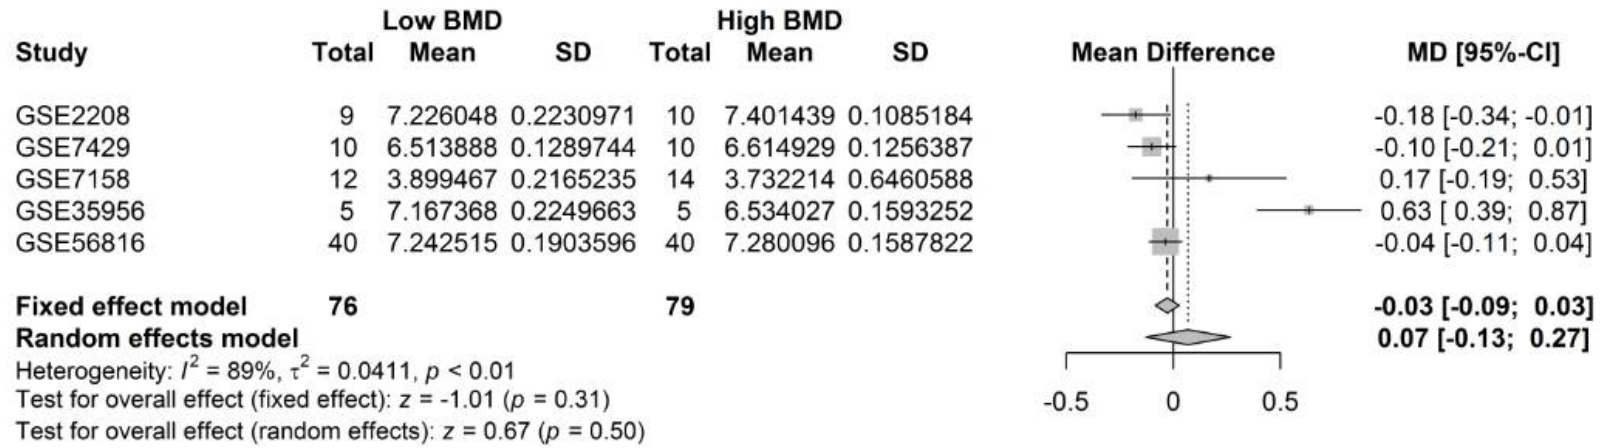

Supplementary Figure 4. Forest plot of *STIM1* expression profiling across five datasets

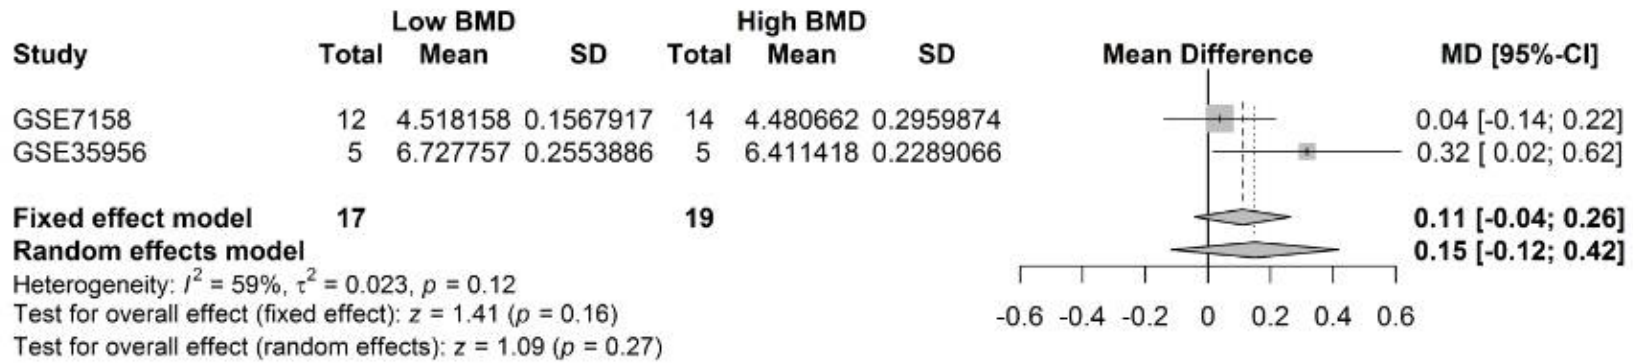

Supplementary Figure 5. Forest plot of *ORAI1* expression profiling across two datasets.

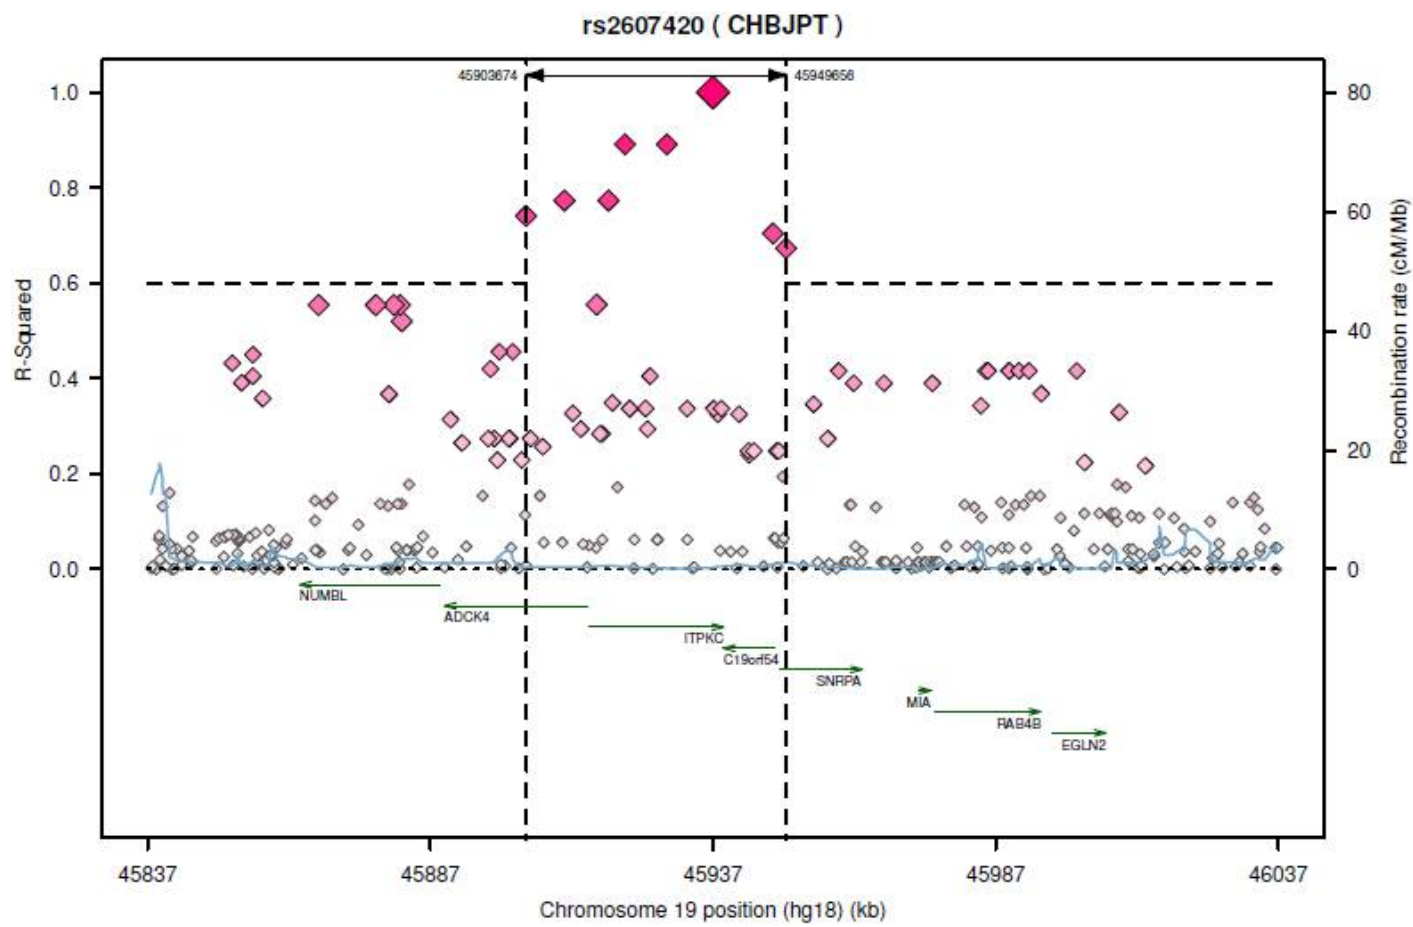

Supplementary Figure 6. Regional plot of rs2607420.

Supplementary Table 1. Basic characteristics of the tag single-nucleotide polymorphisms (SNPs) in *ITPKC*.

| Gene  | Chr | Position (hg38) | Variant    | Ref | Alt | AFR  | AMR  | ASN  | EUR  | TWB  | Our study | HWE p value |
|-------|-----|-----------------|------------|-----|-----|------|------|------|------|------|-----------|-------------|
| STIM1 | 11  | 4082294         | rs2304891  | A   | G   | 0.10 | 0.54 | 0.48 | 0.56 | 0.44 | 0.41      | 0.55        |
| STIM1 | 11  | 4091970         | rs3750996  | G   | A   | 0.00 | 0.00 | 0.20 | 0.00 | 0.22 | 0.24      | 0.43        |
| STIM1 | 11  | 4092165         | rs1561876  | A   | G   | 0.28 | 0.80 | 0.79 | 0.88 | 0.27 | 0.29      | 0.94        |
| STIM1 | 11  | 4092240         | rs3750994  | A   | C   | 0.01 | 0.09 | 0.16 | 0.03 | 0.21 | 0.24      | 0.28        |
| ORAI1 | 12  | 121624817       | rs12320939 | T   | G   | 0.73 | 0.44 | 0.49 | 0.38 | 0.48 | 0.49      | 0.49        |
| ORAI1 | 12  | 121625105       | rs12313273 | C   | T   | 0.30 | 0.27 | 0.25 | 0.18 | 0.29 | 0.31      | 0.88        |
| ORAI1 | 12  | 121631099       | rs7135617  | C   | A   | 0.96 | 0.49 | 0.59 | 0.40 | 0.42 | 0.40      | 0.47        |
| ORAI1 | 12  | 121638011       | rs6486795  | A   | G   | 0.36 | 0.28 | 0.38 | 0.21 | 0.38 | 0.39      | 0.74        |
| ORAI1 | 12  | 121641762       | rs712853   | T   | C   | 0.62 | 0.22 | 0.36 | 0.24 | 0.32 | 0.32      | 0.24        |
| ITPKC | 19  | 40718993        | rs7257602  | A   | G   | 0.24 | 0.56 | 0.47 | 0.45 | 0.43 | 0.47      | 0.02        |
| ITPKC | 19  | 40721201        | rs7251246  | T   | C   | 0.22 | 0.56 | 0.51 | 0.49 | 0.48 | 0.49      | 0.26        |
| ITPKC | 19  | 40722063        | rs890934   | G   | T   | 0.21 | 0.42 | 0.42 | 0.36 | 0.41 | 0.46      | 0.16        |
| ITPKC | 19  | 40729215        | rs10420685 | A   | G   | 0.22 | 0.07 | 0.25 | 0.05 | 0.24 | 0.21      | 0.63        |
| ITPKC | 19  | 40738982        | rs2607420  | T   | C   | 0.82 | 0.76 | 0.76 | 0.73 | 0.73 | 0.27      | 0.86        |
| ITPKC | 19  | 40740473        | rs2290692  | C   | G   | 0.22 | 0.56 | 0.51 | 0.49 | 0.45 | 0.47      | 0.11        |

Ref: reference allele, Alt: Alternative allele. \*Frequency of the Alt allele. AFR: African. AMR: Ad Mixed American. ASN: Asian. EUR: European. TWB: the Taiwan Biobank. HWE: Hardy-Weinberg equilibrium.

Supplementary Table 2. Association between single-nucleotide polymorphisms (SNPs) in *STIMI*, *ORAI1* and bone mineral density in the entire population.

| Gene         | SNP        | Genotype | n   | Lumbar Spine |       |         | n   | Femoral Neck |       |         |
|--------------|------------|----------|-----|--------------|-------|---------|-----|--------------|-------|---------|
|              |            |          |     | Mean         | SE    | p-value |     | Mean         | SE    | p-value |
| <i>STIMI</i> | rs2304891  | A/A      | 281 | 0.995        | 0.012 | 0.691   | 281 | 0.995        | 0.012 | 0.691   |
|              |            | G/A      | 364 | 0.969        | 0.010 |         | 364 | 0.969        | 0.010 |         |
|              |            | G/G      | 131 | 1.024        | 0.017 |         | 131 | 1.024        | 0.017 |         |
| <i>STIMI</i> | rs3750996  | G/G      | 458 | 0.984        | 0.009 | 0.128   | 458 | 0.984        | 0.009 | 0.128   |
|              |            | A/G      | 277 | 0.979        | 0.012 |         | 277 | 0.979        | 0.012 |         |
|              |            | A/A      | 50  | 1.041        | 0.031 |         | 50  | 1.041        | 0.031 |         |
| <i>STIMI</i> | rs1561876  | A/A      | 385 | 0.995        | 0.010 | 0.231   | 385 | 0.995        | 0.010 | 0.231   |
|              |            | G/A      | 298 | 0.967        | 0.011 |         | 298 | 0.967        | 0.011 |         |
|              |            | G/G      | 61  | 1.003        | 0.028 |         | 61  | 1.003        | 0.028 |         |
| <i>STIMI</i> | rs3750994  | A/A      | 450 | 0.990        | 0.010 | 0.740   | 450 | 0.990        | 0.010 | 0.740   |
|              |            | A/C      | 264 | 0.969        | 0.011 |         | 264 | 0.969        | 0.011 |         |
|              |            | C/C      | 52  | 0.995        | 0.030 |         | 52  | 0.995        | 0.030 |         |
| <i>ORAI1</i> | rs12320939 | T/T      | 213 | 0.988        | 0.013 | 0.971   | 213 | 0.988        | 0.013 | 0.971   |
|              |            | G/T      | 387 | 0.978        | 0.010 |         | 387 | 0.978        | 0.010 |         |
|              |            | G/G      | 203 | 0.995        | 0.015 |         | 203 | 0.995        | 0.015 |         |
| <i>ORAI1</i> | rs12313273 | C/C      | 379 | 0.996        | 0.010 | 0.823   | 379 | 0.996        | 0.010 | 0.823   |
|              |            | T/C      | 341 | 0.971        | 0.010 |         | 341 | 0.971        | 0.010 |         |
|              |            | T/T      | 84  | 0.999        | 0.021 |         | 84  | 0.999        | 0.021 |         |
| <i>ORAI1</i> | rs7135617  | C/C      | 288 | 0.986        | 0.011 | 0.483   | 288 | 0.986        | 0.011 | 0.483   |
|              |            | C/A      | 393 | 0.977        | 0.010 |         | 393 | 0.977        | 0.010 |         |
|              |            | A/A      | 128 | 1.006        | 0.019 |         | 128 | 1.006        | 0.019 |         |
| <i>ORAI1</i> | rs6486795  | A/A      | 299 | 0.996        | 0.012 | 0.960   | 299 | 0.996        | 0.012 | 0.960   |
|              |            | G/A      | 381 | 0.970        | 0.009 |         | 381 | 0.970        | 0.009 |         |
|              |            | G/G      | 124 | 1.007        | 0.018 |         | 124 | 1.007        | 0.018 |         |
| <i>ORAI1</i> | rs712853   | T/T      | 367 | 0.986        | 0.010 | 0.918   | 367 | 0.986        | 0.010 | 0.918   |



|     |     |       |       |     |       |       |
|-----|-----|-------|-------|-----|-------|-------|
| C/T | 322 | 0.974 | 0.011 | 322 | 0.974 | 0.011 |
| C/C | 85  | 1.010 | 0.020 | 85  | 1.010 | 0.020 |

---

The  $p$  value was adjusted for age, sex and the body-mass index.

Supplementary Table 3. eQTL results from GTEx

| SNP ID    | Gencode ID (ENSG00000-) | Gene Symbol     | P-Value  | Effect Size | Tissue                         |
|-----------|-------------------------|-----------------|----------|-------------|--------------------------------|
| rs2607420 | 188493.1                | <i>C19orf54</i> | 2.50E-12 | -0.58       | Nerve - tibial                 |
|           | 123815.7                | <i>ADCK4</i>    | 9.90E-12 | -0.39       | Nerve - tibial                 |
|           | 188493.1                | <i>C19orf54</i> | 9.70E-11 | -0.48       | Thyroid                        |
|           | 188493.1                | <i>C19orf54</i> | 1.80E-09 | -0.43       | Artery - tibial                |
|           | 188493.1                | <i>C19orf54</i> | 2.30E-09 | -0.58       | Pancreas                       |
|           | 188493.1                | <i>C19orf54</i> | 2.60E-09 | -0.54       | Artery - aorta                 |
|           | 188493.1                | <i>C19orf54</i> | 6.90E-09 | -0.30       | Stomach                        |
|           | 188493.1                | <i>C19orf54</i> | 1.00E-08 | -0.37       | Esophagus - muscularis         |
|           | 86544.2                 | <i>ITPKC</i>    | 2.00E-08 | -0.26       | Skin - Sun Exposed (Lower leg) |
|           | 188493.1                | <i>C19orf54</i> | 7.10E-08 | -0.60       | Prostate                       |
|           | 188493.1                | <i>C19orf54</i> | 4.20E-07 | -0.38       | Adipose - subcutaneous         |
|           | 188493.1                | <i>C19orf54</i> | 9.70E-07 | -0.48       | Spleen                         |
|           | 188493.1                | <i>C19orf54</i> | 1.70E-06 | -0.27       | Whole blood                    |
